# Supplementary material
Source: MDPI journal article supplement (https://www.mdpi.com/2076-0760/5/4/76)
Supplement: s1 [file s1]

Supplementary Materials: The Influence of Religiously and Scientifically Framed Messages on Agreement with Water Use Restrictions

John M. Clements


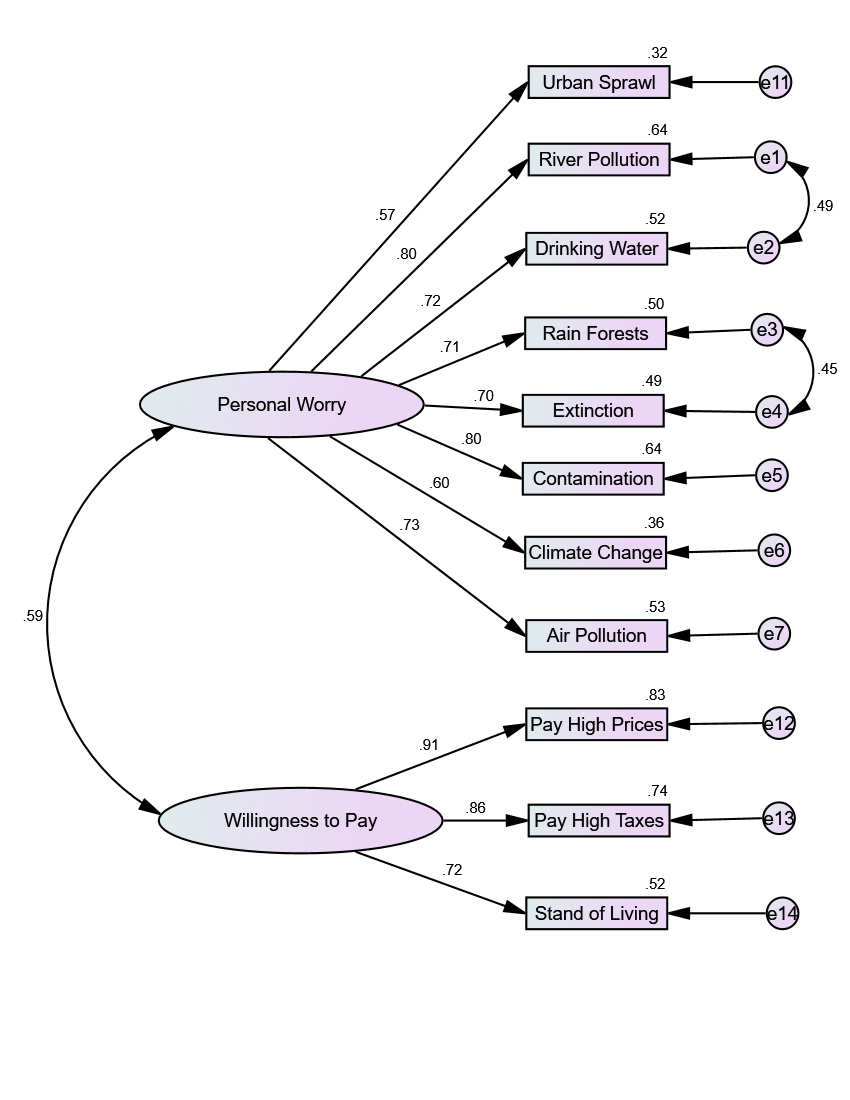


**Figure S1.** Confirmatory factor analysis (CFA) model.

**Table S1. Descriptive statistics for CFA model latent variables and indicators**

| **Latent Variable** | **Variance** | **Standard Error** | **Covariance (SE) *** | **Correlation *** |
| --- | --- | --- | --- | --- |
| Personal Worry | 0.459 | 0.041 | 0.410 (0.039) | 0.59 |
| Willingness to Pay | 1.064 | 0.078 |  |  |
| Indicators | r-square |  |  |  |
| *Personal Worry* | | | | |
| Urban Sprawl | 0.32 |  |  |  |
| River Pollution | 0.64 |  |  |  |
| Drinking Water | 0.52 |  |  |  |
| Rain Forests | 0.50 |  |  |  |
| Extinction | 0.49 |  |  |  |
| Contamination | 0.64 |  |  |  |
| Climate Change | 0.36 |  |  |  |
| Air Pollution | 0.53 |  |  |  |
| *Willingness to Pay* | | | | |
| Pay Higher Prices | 0.83 |  |  |  |
| Pay Higher Taxes | 0.74 |  |  |  |
| Change Standard of Living | 0.52 |  |  |  |

Note: * Indicates covariance or correlation between Worry and Willingness to Pay latent variables.
